# Variability of Urinary Albumin Excretion in Patients With Microalbuminuria

GEORGE PHILLIPOU, PHD  
PATRICK J. PHILLIPS, FRACP

**OBJECTIVE** — To estimate the within-person variability ( $SD_i$ ) for the overnight urinary albumin excretion rate (AER) in diabetic patients with persistent microalbuminuria.

**RESEARCH DESIGN AND METHODS** — Thirteen normotensive diabetic patients in stable medical control, with normal renal function and without any associated cardiovascular or other clinical disorders, collected overnight urines at monthly intervals during one year. AER was determined by radioimmunoassay.

**RESULTS** — Analysis of individual series of AER showed a significant trend ( $P \leq 0.01$ ) in three cases. The remaining patients (eight men, two women; seven with insulin-dependent diabetes mellitus) had a median mean AER 102  $\mu\text{g}/\text{min}$  (range 30–238  $\mu\text{g}/\text{min}$ ). Because the individual mean AERs were significantly associated with their respective  $SD_i$ s, the data was  $\log_e$  transformed.  $\log_e SD_i$  was estimated as 0.420, and its 90% probability range (0.353–0.490) was calculated using the bootstrap method.

**CONCLUSIONS** — The high within-person variance for AER means that only people with an initial AER in the range of 53–76  $\mu\text{g}/\text{min}$  have a high probability ( $P \geq 0.95$ ) of being classified as microalbuminuric (20–200  $\mu\text{g}/\text{min}$ ) on a subsequent specimen. However, subjects with an initial AER  $\geq 53$  or  $\geq 80$   $\mu\text{g}/\text{min}$  have a 95 and 99% probability of persistent microalbuminuria. The large variability of AER limits its potential as a serial marker to detect any gradual deterioration of established renal dysfunction.

From the Endocrine and Diabetes Service, The Queen Elizabeth Hospital, Woodville, South Australia.

Address correspondence and reprint requests to George Phillipou, PhD, Endocrine and Diabetes Laboratory, The Queen Elizabeth Hospital, Woodville, South Australia 5011.

Received for publication 12 April 1993 and accepted in revised form 18 November 1993.

AER, albumin excretion rate;  $SD_i$ , within-person variability; ACE, angiotensin-converting enzyme; dbP, diastolic blood pressure; BMI, body mass index; RIA, radioimmunoassay; UTI, urinary tract infection; IDDM, insulin-dependent diabetes mellitus; LL, lower limit; UL, upper limit.

We define microalbuminuria as an overnight albumin excretion rate (AER) of 20 to 200  $\mu\text{g}/\text{min}$ . Persistent microalbuminuria is a marker for development of overt nephropathy, proliferative retinopathy, and cardiovascular morbidity/mortality (1). Assessment of the significance of changes in urinary albumin excretion requires knowledge of the within-person variation ( $SD_i$ ) in the diabetic population and the analytical imprecision of the method (2). However, current estimates of the within-person variability vary widely (3–7), and many have been derived over short periods and/or in heterogeneous groups with differing degrees of albuminuria.

In this study, we have estimated the intra-individual variability of AER over a 12-month period in a group of medically stable normotensive diabetic subjects with persistent microalbuminuria.

## RESEARCH DESIGN AND METHODS

Subjects ( $n = 13$ ) were placebo-controlled in a double-blind, randomized multicenter trial that evaluated treatment with an angiotensin-converting enzyme (ACE) inhibitor (8). Inclusion criteria were an AER of 20–200  $\mu\text{g}/\text{min}$  on at least 2 of 3 occasions, GHb  $<13.5\%$ , mean sitting diastolic blood pressure (dbP)  $\leq 95$  mmHg on at least 2 of 3 occasions, body mass index (BMI)  $\leq 32$   $\text{kg}/\text{m}^2$ , and compliance  $\geq 80\%$ . Patients were excluded if they had cardiovascular or certain other medical diseases, were taking medication affecting blood pressure, or had a history of any contraindication to ACE inhibitors.

Timed overnight urine specimens (mean 12.3, range 9–13) were collected from each subject at monthly intervals, and the albumin concentrations were analyzed at a single center using a commercial radioimmunoassay (RIA) kit (Pharmacia South Seas, Sydney, Australia). The long-term total (intra- plus inter-) assay variability was 10, 4.2, and 7.8% at urinary albumin concentrations of 3.6, 27, and 52  $\text{mg}/\text{L}$ , respectively. Although it is

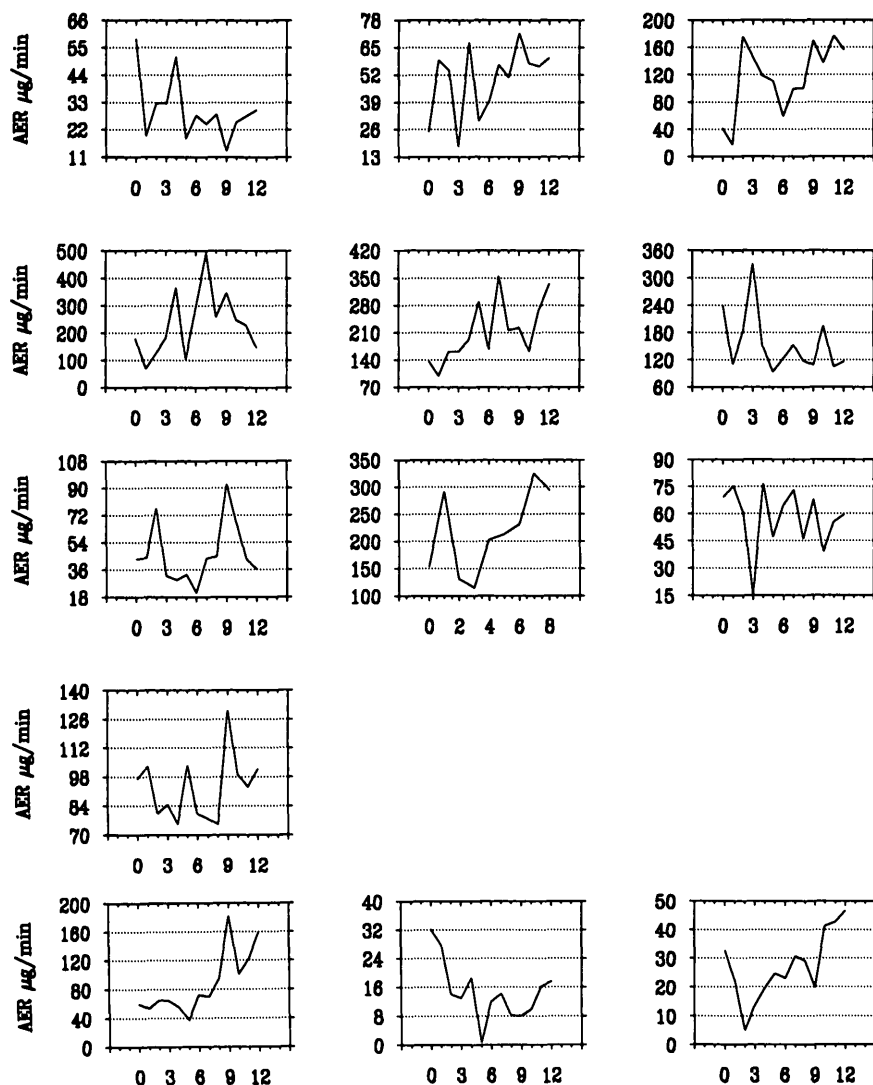

Figure 1—Plots of AER ( $\mu\text{g}/\text{min}$ ) versus time (months) for 13 normotensive diabetic subjects. The bottom panels of three plots are subjects for which the serial AER values had a significant trend.

recognized that nondiabetic renal or systemic disease, including hypertension, urinary tract infections (UTIs), congestive heart disease, exercise, or use of anti-inflammatory drugs may significantly alter AER, the design of the study excluded these possibilities except for UTI. Each specimen was tested for UTI, and, if it was found, we requested a follow-up specimen when the UTI had been resolved. The importance of accurate timing and complete urine collection was stressed by the study personnel and reinforced by written materials.

Each AER series was tested, using the Grub procedure (9), and shown to have no outliers ( $P \leq 0.01$ ). The ratio of the mean square successive difference to the variance was calculated for each individual AER data set and compared with the published values (10) to test for a significant trend. The bootstrap technique (11) was used to estimate the magnitude of deviation of  $\text{SD}_i$  from the true value. This method draws numerous artificial samples from a random sample to determine the accuracy of a statistical estimator (mean  $\text{SD}_i$ ).

**RESULTS**— Because the derivation of within-person variability assumes random, independent fluctuations about a set point, any systematic change in the mean will increase the estimate of the standard deviation. Accordingly, all serial AER sets were tested for trend, which was statistically significant in three cases (two men/one woman; two with insulin-dependent diabetes mellitus [IDDM]). The AER data for all subjects is shown in Fig. 1.

The 10 subjects (eight men/two women) whose AER data showed no trend included 7 with IDDM. This group had a median age of 47 years; duration of diabetes of 16 years; GHb of 11.5%; BMI of  $26.8 \text{ kg}/\text{m}^2$ ; and mean dBp of 74.2 mmHg. The median of mean plasma creatinine concentrations during the study was  $81 \mu\text{M}$ , and the range of means was  $66\text{--}93 \mu\text{M}$  (normal range is  $50\text{--}120 \mu\text{M}$ ). No significant relationship was noted (Spearman  $r$ ,  $P \geq 0.4$ ,  $n = 10$ ) between AER and the respective age, duration of diabetes, BMI, GHb, plasma creatinine, or dBp where the individual values for AER, GHb, creatinine, and dBp were the corresponding subject means. Considering an association between increased AER and many of the latter variables has been shown (12), our negative findings undoubtedly reflect both the small sample size and the particular subject cohort selected.

The median mean AER was  $102 \mu\text{g}/\text{min}$  (range  $30\text{--}238 \mu\text{g}/\text{min}$ ). Because  $\text{SD}_i$  was found to be significantly associated (Spearman  $r = 0.879$ ,  $P \leq 0.001$ ) with the mean, the data was  $\log_e$  transformed, and the resulting  $\text{SD}_i$ s were established as independent of the respective means ( $r = -0.0424$ ). The mean  $\log_e \text{SD}_i$  for the sample was 0.420, with a 90% probability of the true value being between 0.353 and 0.490 (11). When the entire data set ( $n = 13$ ) was analyzed, the mean  $\log_e \text{SD}_i$  increased to 0.473 and the associated 90% probability range was 0.398–0.556.

Given the estimate of  $\log_e \text{SD}_i$  as 0.42 and the defined range of microalbuminuria as between the lower limit of 20

$\mu\text{g}/\text{min}$  (LL;  $\log_e = 2.9957$ ) and the upper limit of  $200 \mu\text{g}/\text{min}$  (UL;  $\log_e = 5.2983$ ), specific AER thresholds may be computed, above or below which there is a low likelihood ( $P \leq 0.05$ , one-tail;  $Z = 1.64$ ) that a second measurement will fall outside  $20\text{--}200 \mu\text{g}/\text{min}$ . For example, the lower threshold is estimated as  $53 \mu\text{g}/\text{min}$  using the formula  $LL + \sqrt{2} \cdot Z \cdot SD_i$  ( $2.9957 + 1.414 \cdot 1.64 \cdot 0.42 = 3.9698$ ). Similarly, the upper threshold is calculated as  $76 \mu\text{g}/\text{min}$  ( $UL - \sqrt{2} \cdot Z \cdot SD_i$ ). Therefore, if a subject has an AER  $\geq 53 \mu\text{g}/\text{min}$ , the probability is  $\leq 5\%$  that a subsequent specimen will be  $\leq 20 \mu\text{g}/\text{min}$ . Alternatively, if the AER value is  $\leq 76 \mu\text{g}/\text{min}$ , then the likelihood a second specimen is  $\geq 200 \mu\text{g}/\text{min}$  is  $\leq 5\%$ . A subject may also be classified as having persistent microalbuminuria on a single estimation of the AER if the respective value is  $\geq 53$  ( $P \geq 0.95$ ) or  $\geq 80$  ( $P \geq 0.99$ )  $\mu\text{g}/\text{min}$ .

**CONCLUSIONS**— We observed some significant distinctions between this study and previous studies (3–7) of AER variability in subjects with diabetes. These differences relate to short-term sampling protocols (4,5,7), combining patients with normo- and microalbuminuria (5,6), lack of definition of patient blood pressure status (3,5,7), restriction to patients with IDDM (3,4,6), and failure to analyze AER series for significant trends (1,6). Furthermore, during this study, all patients were in stable medical control, with no episodes of acute illness or hospitalization.

As also noted by Watts et al. (6), the variability and range of AER values requires  $\log_e$  transformation of the data before calculation of the within-person variance. Other studies (3–5,7) provide estimates of  $SD_i$  based on parametric data despite the significant index of heterogeneity noted (5). Accordingly, meaningless critical differences ( $>100\%$ ) are reported for a significant change (5). This study establishes that only AER values within a narrow range of  $53\text{--}76 \mu\text{g}/\text{min}$  are asso-

ciated with a high probability that a subsequent estimation will also be within limits ( $20\text{--}200 \mu\text{g}/\text{min}$ ) that define microalbuminuria.

Watts et al. (6) estimated  $\log_e SD_i$  at 0.594, using a 3-month sampling interval in subjects with IDDM and normo- or microalbuminuria. This is considerably higher than the  $\log_e SD_i$  of 0.420 calculated in this study or even our estimate of the 95th percentile (0.490). We attribute our lower  $SD_i$  estimate to several factors, including the medical stability of the patients, restriction to patients with persistent microalbuminuria, a more frequent sampling schedule, and exclusion of all individual AER series showing a significant trend. Our estimate of  $SD_i$  is likely to be exceeded in routine clinical practice, and clinicians should be aware of the limitations of AER in diagnosing and especially monitoring diabetic nephropathy.

The high variance of AER restricts its application as a sensitive longitudinal measure of progressive renal dysfunction; the variance could be improved only by multiple sampling, which is normally impractical. Even with triplicate sampling, the 95% confidence interval for an AER of  $100 \mu\text{g}/\text{min}$  would remain at 62 to 161  $\mu\text{g}/\text{min}$ . In contrast, the respective within-person variation for plasma creatinine in the same group was estimated at  $\sim 7.0\%$ , indicating that an 18% increase in successive creatinine values would be statistically significant ( $P \leq 0.05$ ) (G.P., P.J.P., unpublished observations).

Confirmation of persistent microalbuminuria for diabetic subjects is an important finding with long-term prognostic significance for the development of diabetic nephropathy (1). The results suggest that a single AER measurement  $\geq 80 \mu\text{g}/\text{min}$  is confirmatory for persistent microalbuminuria. The detection of any gradual and systematic deterioration in established renal dysfunction may require serial AER measurements and more complex time series analysis (13) or frequent sequential monitoring of plasma creatinine.

## References

1. Deckert T, Kofoed-Enevoldsen A, Norgaard K, Borch-Johnsen K, Feldt-Rasmussen B, Jensen T: Microalbuminuria. *Diabetes Care* 15:1181–1188, 1993
2. Fraser CG: Biological variation in clinical chemistry. *Arch Pathol Lab Med* 116:916–923, 1992
3. Feldt-Rasmussen B, Mathiesen ER: Variability of urinary albumin excretion in incipient diabetic nephropathy. *Diabetic Nephrol* 3:101–103, 1984
4. Cohen DL, Close CF, Viberti GC: The variability of overnight albumin excretion in insulin-dependent diabetic and normal subjects. *Diabetic Med* 4:437–440, 1987
5. Howey JEA, Browning MCK, Fraser CG: Selecting the optimum specimen for assessing slight albuminuria, and a strategy for clinical investigation: novel uses of data on biological variation. *Clin Chem* 33:2034–2038, 1987
6. Watts GF, Kubal C, Chinn S: Long-term monitoring of urinary albumin excretion in insulin-dependent diabetes mellitus: some practical recommendations for monitoring microalbuminuria. *Diabetes Res Clin Pract* 9:169–177, 1990
7. Johnston J, Paterson KR, O'Rielly DSJ: Estimating urinary albumin excretion rate of diabetic patients in clinical practice. *BMJ* 306:493–494, 1993
8. Phillips PJ, Phillipou G, Bowen KM, Lowe J, Yue DK, Wischusen J, Pater G: Diabetic microalbuminuria and Cilazapril. *Am J Med* 94 (Suppl. 4A):58S–60S, 1993
9. Horowitz W: Protocol for the design, conduct and interpretation of collaborative studies. *Pure Appl Chem* 60:855–864, 1988
10. Hart BI: Tabulation of the probabilities for the ratio of the mean square successive difference to the variance. *Ann Math Stat* 13:207–214, 1942
11. Diaconis P, Efron B: Computer intensive methods in statistics. *Sci Am* 248:1416–1422, 1983
12. Selby JV, FitzSimmons SC, Newman JM, Katz PP, Sepe S, Showstack J: The natural history and epidemiology of diabetic nephropathy. *JAMA* 263:1954–1960, 1990
13. Albert A, Harris EK: *Multivariate Interpretation of Clinical Laboratory Data*. New York, Marcel Dekker, 1987
